# Supplementary material
Source: ML conference proceedings conference paper supplement (https://proceedings.mlr.press/v161/min21a.html)
Supplement: Supplementary file [file min21a-supp.pdf]

---

# The Curious Case of Adversarially Robust Models: More Data Can Help, Double Descend, or Hurt Generalization (Supplementary material)

---

Yifei Min<sup>1</sup>

Lin Chen<sup>2</sup>

Amin Karbasi<sup>3</sup>

<sup>1</sup>Dept. of Statistics and Data Science, Yale University, New Haven, CT, USA

<sup>2</sup>Simons Institute for the Theory of Computing, University of California, Berkeley, Berkeley, CA, USA

<sup>3</sup> Dept. of Electrical Engineering, Yale University, New Haven, CT, USA

## 1 PROOF OF RESULTS FOR THE GAUSSIAN MODEL

In this section we give the proof of Theorem 1 and Corollary 2.

Before proving Theorem 1, we need to establish several lemmas. First we restate the result by Chen et al. [2020b] that gives the closed form solution for the robust classifier.

**Proposition 1** (Lemma 10 in Chen et al. [2020b]). *Given  $n$  training data points  $\{(x_i, y_i)\}_{i=1}^n \subset \mathbb{R}^d \times \{\pm 1\}$  and  $\varepsilon > 0$ , if the robust classifier is defined as (3), then we have  $w_n^{\text{rob}} = W \text{sign}(u - \varepsilon \text{sign}(u))$ , where  $u = \frac{1}{n} \sum_{i=1}^n y_i x_i$ .*

First, we define the error function  $\text{erf}(\cdot) : \mathbb{R} \rightarrow \mathbb{R}$  by

$$\text{erf}(x) = \frac{2}{\sqrt{\pi}} \int_0^x e^{-t^2} dt, \quad (1)$$

and it has the following property.

**Lemma 2.** *If  $z \sim \mathcal{N}(0, 1)$ , we have*

$$\mathbb{P}(z < x) = \frac{1}{2} \left[ 1 + \text{erf} \left( \frac{x}{\sqrt{2}} \right) \right].$$

*Proof of Lemma 2.* In light of the density of the standard normal distribution and by a change of variable, we have

$$\mathbb{P}(z < x) = \frac{1}{2} + \frac{1}{\sqrt{2\pi}} \int_0^x e^{-\frac{t^2}{2}} dt = \frac{1}{2} + \frac{\sqrt{2}}{\sqrt{2\pi}} \int_0^{x/\sqrt{2}} e^{-s^2} ds = \frac{1}{2} \left[ 1 + \text{erf} \left( \frac{x}{\sqrt{2}} \right) \right].$$

□

In addition, we define the function  $L(\cdot, \cdot) : \mathbb{R}^2 \rightarrow \mathbb{R}$  by

$$L(v, \varepsilon') = \text{erf}(v) + \text{erf}(v(\varepsilon' - 1)) - \text{erf}(v(\varepsilon' + 1)). \quad (2)$$

For all  $j \in [d]$ , we define

$$v_j = \frac{\sqrt{n}\mu(j)}{\sqrt{2}\sigma(j)}, \quad \varepsilon'_j = \frac{\varepsilon}{\mu(j)}, \quad (3)$$

where  $\mu(j)$  and  $\sigma(j)$  are defined in the data generation process described at the beginning of Section 4.

Lemma 3 gives the expression for the generalization error.

**Lemma 3.** Suppose that the generalization error is defined as in (4). Then we have

$$L_n = W \sum_{j \in [d]} \mu(j) L(v_j, \varepsilon'_j),$$

where  $v_j$  and  $\varepsilon'_j$  are defined in (3).

*Proof of Lemma 3.* By (4), Proposition 1 and the independence between test and training data, we have

$$\begin{aligned} L_n &= -\mathbb{E}_{\{(x_i, y_i)\}_{i=1}^n \stackrel{\text{i.i.d.}}{\sim} \mathcal{D}_{\mathcal{N}}} [\mathbb{E}_{(x, y) \sim \mathcal{D}_{\mathcal{N}}} [y \langle w_n^{\text{rob}}, x \rangle]] = -\mathbb{E}_{\{(x_i, y_i)\}_{i=1}^n \stackrel{\text{i.i.d.}}{\sim} \mathcal{D}_{\mathcal{N}}} [\langle w_n^{\text{rob}}, \mu \rangle] \\ &= -W \cdot \sum_{j \in [d]} \mu(j) \mathbb{E}_{\{(x_i, y_i)\}_{i=1}^n \stackrel{\text{i.i.d.}}{\sim} \mathcal{D}_{\mathcal{N}}} [\text{sign}(u(j) - \varepsilon \text{sign}(u(j)))] \end{aligned}$$

Since  $y_i x_i \sim \mathcal{N}(\mu, \Sigma)$ , we have  $u \sim \mathcal{N}(\mu, \frac{\Sigma}{n})$ , and it follows that

$$L_n = -W \cdot \sum_{j \in [d]} \mu(j) \mathbb{E}_{u(j) \sim \mathcal{N}(\mu(j), \frac{\sigma^2(j)}{n})} [\text{sign}(u(j) - \varepsilon \text{sign}(u(j)))] .$$

Denote  $I_j = -\mathbb{E}_{u(j) \sim \mathcal{N}(\mu(j), \frac{\sigma^2(j)}{n})} [\text{sign}(u(j) - \varepsilon \text{sign}(u(j)))]$ . Then we have

$$\begin{aligned} I_j &= \mathbb{P}(u(j) < -\varepsilon) - \mathbb{P}(-\varepsilon < u(j) < 0) + \mathbb{P}(0 < u(j) < \varepsilon) - \mathbb{P}(\varepsilon < u(j)) \\ &= 1 - 2\mathbb{P}(-\varepsilon < u(j) < 0) - 2\mathbb{P}(\varepsilon < u(j)) \\ &= 1 - 2\mathbb{P}\left(\frac{(-\varepsilon - \mu(j))\sqrt{n}}{\sigma(j)} < z < \frac{-\mu(j)\sqrt{n}}{\sigma(j)}\right) - 2\mathbb{P}\left(\frac{(\varepsilon - \mu(j))\sqrt{n}}{\sigma(j)} < z\right) \\ &= 1 - 2\left[\mathbb{P}\left(z < \frac{(\varepsilon + \mu(j))\sqrt{n}}{\sigma(j)}\right) - \mathbb{P}\left(z < \frac{\mu(j)\sqrt{n}}{\sigma(j)}\right)\right] - 2\left[1 - \mathbb{P}\left(z < \frac{(\varepsilon - \mu(j))\sqrt{n}}{\sigma(j)}\right)\right], \end{aligned}$$

where  $z$  is a standard normal random variable. By Lemma 2 we have

$$\begin{aligned} I_j &= \text{erf}\left(\frac{\mu(j)\sqrt{n}}{\sqrt{2}\sigma(j)}\right) + \text{erf}\left(\frac{(\varepsilon - \mu(j))\sqrt{n}}{\sqrt{2}\sigma(j)}\right) - \text{erf}\left(\frac{(\varepsilon + \mu(j))\sqrt{n}}{\sqrt{2}\sigma(j)}\right) \\ &= \text{erf}(v_j) + \text{erf}(v_j(\varepsilon'_j - 1)) - \text{erf}(v_j(\varepsilon'_j + 1)) = L(v_j, \varepsilon'_j), \end{aligned}$$

which implies that  $L_n = W \sum_{j \in [d]} \mu(j) L(v_j, \varepsilon'_j)$ . □

Note that  $L(v, \varepsilon')$  is differentiable in  $v$ , and by our definition each  $v_j$  is smooth and monotonic in  $n$ . Together with Lemma 3 we know that  $L_n$  is differentiable w.r.t.  $n$ . Therefore, to study the dynamic of  $L_n$  in  $n$ , it is equivalent to studying the derivative  $\frac{dL_n}{dn}$ . We define the function  $f(\cdot, \cdot) : \mathbb{R}^2 \rightarrow \mathbb{R}$  by

$$f(t, \varepsilon') = t - (1 + \varepsilon')t^{(1+\varepsilon')^2} - (1 - \varepsilon')t^{(1-\varepsilon')^2} .$$

In Lemma 4, we compute the partial derivative of  $L$ .

**Lemma 4.** Let  $t = e^{-v^2}$  and  $f$  be defined as in (1). The partial derivative of  $L(v, \varepsilon')$  w.r.t.  $v$  is given by

$$\frac{\partial L(v, \varepsilon')}{\partial v} = \frac{2}{\sqrt{\pi}} f(t, \varepsilon') .$$

*Proof of Lemma 4.* By (1) we have

$$\frac{d}{dx} \text{erf}(x) = \frac{2}{\sqrt{\pi}} e^{-x^2},$$

and it follows by (2) that

$$\frac{\partial L(v, \varepsilon')}{\partial v} = \frac{2}{\sqrt{\pi}} e^{-v^2} + (\varepsilon' - 1) \frac{2}{\sqrt{\pi}} e^{-v^2 \cdot (\varepsilon' - 1)^2} - (\varepsilon' + 1) \frac{2}{\sqrt{\pi}} e^{-v^2 \cdot (\varepsilon' + 1)^2} = \frac{2}{\sqrt{\pi}} f(t, \varepsilon') .$$

□

The proof of Theorem 1 follows from studying the derivative  $\frac{dL_n}{dn}$ . Lemma 4 implies that the derivative depends on the sign of the function  $f$ . We investigate the sign of  $f$  in Lemma 5.

**Lemma 5.** *There exist  $0 < \delta_1 \leq \delta_2 < 1$  such that the following statements hold.*

- (a) *When  $0 < \varepsilon' < \delta_1$ ,  $f(t, \varepsilon') < 0$  for  $\forall t \in (0, 1)$ .*  
(b) *When  $\delta_2 < \varepsilon' < 1$ , there exist  $0 < \tau_1 < \tau_2 < 1$  depending on  $\varepsilon'$  such that*

$$f(t, \varepsilon') \begin{cases} < 0 & \forall t \in (0, \tau_1), \\ > 0 & \forall t \in (\tau_1, \tau_2), \\ < 0 & \forall t \in (\tau_2, 1), \end{cases}$$

and

$$\begin{aligned} \lim_{\varepsilon' \rightarrow 1^-} \tau_1(\varepsilon') &= 0, \\ \tau_2(\varepsilon') &\geq \frac{1}{3}. \end{aligned}$$

- (c) *When  $1 \leq \varepsilon'$ ,  $f(t, \varepsilon')$ , there exists  $\tau_2 < 1$  such that*

$$f(t, \varepsilon') \begin{cases} > 0 & \forall t \in (0, \tau_2), \\ < 0 & \forall t \in (\tau_2, 1). \end{cases}$$

We compute the partial derivative of  $f$  w.r.t.  $t$

$$f'(t, \varepsilon') = \frac{\partial f(t, \varepsilon')}{\partial t} = 1 - (1 + \varepsilon')^3 t^{(1+\varepsilon')^2-1} - (1 - \varepsilon')^3 t^{(1-\varepsilon')^2-1}.$$

The proof of Lemma 5 uses the following Lemma 6 and Lemma 7. To make it concise, whenever we fix  $\varepsilon'$  in the context, we omit  $\varepsilon'$  and write  $f(t) = f(t, \varepsilon')$  and  $f'(t) = f'(t, \varepsilon')$ .

**Lemma 6.** *The right-sided limit of  $f'$  at 0 is given by*

$$\lim_{t \rightarrow 0^+} f'(t) = \begin{cases} -\infty & \text{if } 0 < \varepsilon' < 1, \\ 1 & \text{if } \varepsilon' = 1, \\ +\infty & \text{if } 1 < \varepsilon' < 2. \end{cases}$$

In addition, we have

$$\lim_{t \rightarrow 1^-} f'(t) < 0, \quad \forall 0 < \varepsilon'.$$

The proof of Lemma 6 follows from direct computation. Using Lemma 6, we obtain Lemma 7.

**Lemma 7.** *For any fixed  $0 < \varepsilon' < 1$ , there exists some  $t_0 = t_0(\varepsilon') \in (0, 1)$  such that  $f'(t)$  is strictly increasing for  $t \in (0, t_0)$  and strictly decreasing for  $t \in (t_0, 1)$ . For any fixed  $1 \leq \varepsilon' \leq 2$ ,  $f'(t)$  is strictly decreasing for  $t \in (0, 1)$ .*

*Proof of Lemma 7.* We differentiate  $f'$  w.r.t.  $t$  to get

$$\frac{\partial f'(t)}{\partial t} = -(1 + \varepsilon')^3 \left[ (1 + \varepsilon')^2 - 1 \right] t^{(1+\varepsilon')^2-2} - (1 - \varepsilon')^3 \left[ (1 - \varepsilon')^2 - 1 \right] t^{(1-\varepsilon')^2-2}.$$

First we consider the case where  $0 < \varepsilon' < 1$ . The function  $f'$  is continuously differentiable on  $(t, \varepsilon') \in (0, 1) \times (0, 1)$ . For any fixed  $\varepsilon' < 1$ , setting  $\frac{\partial f'(t)}{\partial t} = 0$  yields the unique solution of  $t$  in  $(0, 1)$  as

$$t_0 = \left[ \left( \frac{1 + \varepsilon'}{1 - \varepsilon'} \right)^3 \left( \frac{2 + \varepsilon'}{2 - \varepsilon'} \right) \right]^{-\frac{1}{4\varepsilon'}}. \quad (4)$$

Since  $\lim_{t \rightarrow 0^+} f'(t) = -\infty$ ,  $f'(t)$  is strictly increasing w.r.t.  $t \in (0, t_0)$ . Also note that

$$\begin{aligned} \lim_{t \rightarrow 1^-} \frac{\partial f'(t)}{\partial t} &= \lim_{t \rightarrow 1^-} - (1 + \varepsilon')^3 \left[ (1 + \varepsilon')^2 - 1 \right] t^{(1+\varepsilon')^2-2} - (1 - \varepsilon')^3 \left[ (1 - \varepsilon')^2 - 1 \right] t^{(1-\varepsilon')^2-2} \\ &= -2\varepsilon'^2 (5\varepsilon'^2 + 7) < 0, \end{aligned}$$

which together with  $\frac{\partial}{\partial t}(f'(t_0)) = 0$  indicates that  $f'(t)$  is strictly decreasing for  $t \in (t_0, 1)$ . We conclude that  $t_0$  is the unique local extreme and also the global maximum of  $f'(t)$  on  $t \in (0, 1)$ .

For  $1 \leq \varepsilon' \leq 2$ , we have for all  $t \in (0, 1)$

$$\begin{aligned} -(1 + \varepsilon')^3 \left[ (1 + \varepsilon')^2 - 1 \right] t^{(1+\varepsilon')^2-2} &< 0, \\ -(1 - \varepsilon')^3 \left[ (1 - \varepsilon')^2 - 1 \right] t^{(1-\varepsilon')^2-2} &\leq 0. \end{aligned}$$

It follows that  $\frac{\partial f'(t)}{\partial t} < 0$ , which implies that  $f'(t)$  is strictly decreasing. □

A direct application of Lemma 7 gives the following Lemma 8

**Lemma 8.** For all  $0 < \varepsilon' < 1$  sufficiently close to 1,  $f'(t)$  has exactly two zeros on  $t \in (0, 1)$ .

*Proof of Lemma 8.* By Lemma 7, we know that  $f'(t)$  is strictly increasing on  $t \in (0, t_0)$  and strictly decreasing on  $(t_0, 1)$ . Recall that Lemma 6 shows that for  $0 < \varepsilon' < 1$ ,  $\lim_{t \rightarrow 0^+} f'(t) = -\infty$  and  $\lim_{t \rightarrow 1^-} f'(t) < 0$ . Therefore it suffices to show  $f'(t_0) > 0$  for all  $\varepsilon'$  sufficiently close to  $1^-$ . We define

$$A = \left( \frac{1 + \varepsilon'}{1 - \varepsilon'} \right)^3 \left( \frac{2 + \varepsilon'}{2 - \varepsilon'} \right). \quad (5)$$

We have  $A$  tends to  $+\infty$  as  $\varepsilon' \rightarrow 1^-$ . We then write

$$f'(t_0) = 1 - (1 + \varepsilon')^3 A^{-\frac{1}{2} - \frac{\varepsilon'}{4}} - (1 - \varepsilon')^3 A^{\frac{1}{2} - \frac{\varepsilon'}{4}}.$$

Note that  $\lim_{\varepsilon' \rightarrow 1^-} (1 + \varepsilon')^3 A^{-\frac{1}{2} - \frac{\varepsilon'}{4}} = 0$ , and

$$\lim_{\varepsilon' \rightarrow 1^-} (1 - \varepsilon')^3 A^{\frac{1}{2} - \frac{\varepsilon'}{4}} = \lim_{\varepsilon' \rightarrow 1^-} (1 - \varepsilon')^{\frac{3}{2} + \frac{3\varepsilon'}{4}} \cdot \left[ (1 + \varepsilon')^3 \left( 1 + \frac{2\varepsilon'}{2 - \varepsilon'} \right) \right]^{\frac{1}{2} - \frac{\varepsilon'}{4}} = 0.$$

Therefore we conclude that  $f'(t_0) > 0$  as  $\varepsilon' \rightarrow 1^-$ . □

We denote the two zeros in Lemma 8 by  $t_1 = t_1(\varepsilon')$  and  $t_2 = t_2(\varepsilon')$  where  $t_1 < t_2$ .

Now we are ready to prove Lemma 5.

*Proof of Lemma 5.* We show (a) first. Note that for any fixed  $\varepsilon' < 1$ ,  $f(0) = 0$ . Therefore it suffices to show that for any  $\varepsilon'$  sufficiently close to 0, the derivative  $f'(t) < 0$ . Since by Lemma 7 we have  $f'(t) < \sup_{t \in (0,1)} f'(t) = f'(t_0)$  when  $0 < \varepsilon' < 1$ , it remains to show that  $f'(t_0) < 0$  for all  $\varepsilon'$  sufficiently close to 0.

In light of (4),  $f'(t_0) < 0$  is equivalent to

$$1 - (1 + \varepsilon')^3 \left[ \left( \frac{1 + \varepsilon'}{1 - \varepsilon'} \right)^3 \left( \frac{2 + \varepsilon'}{2 - \varepsilon'} \right) \right]^{-\frac{\varepsilon'^2 + 2\varepsilon'}{4\varepsilon'}} - (1 - \varepsilon')^3 \left[ \left( \frac{1 + \varepsilon'}{1 - \varepsilon'} \right)^3 \left( \frac{2 + \varepsilon'}{2 - \varepsilon'} \right) \right]^{-\frac{\varepsilon'^2 - 2\varepsilon'}{4\varepsilon'}} < 0.$$

Recall that we define

$$A = \left( \frac{1 + \varepsilon'}{1 - \varepsilon'} \right)^3 \left( \frac{2 + \varepsilon'}{2 - \varepsilon'} \right).$$

Rearranging the terms yields  $A^{\varepsilon'/4} < (1 + \varepsilon')^3 A^{-1/2} + (1 - \varepsilon')^3 A^{1/2}$ . Since  $A > 1$  and  $\varepsilon' < 1$ , we have  $A^{\varepsilon'/4} < A^{1/2}$ . Thus it now suffices to show  $A^{1/2} < (1 + \varepsilon')^3 A^{-1/2} + (1 - \varepsilon')^3 A^{1/2}$ , or equivalently  $A < (1 + \varepsilon')^3 / [1 - (1 - \varepsilon')^3]$ . We can further simplify this into

$$\frac{2 + \varepsilon'}{2 - \varepsilon'} < \frac{(1 - \varepsilon')^3}{1 - (1 - \varepsilon')^3}.$$

Finally, note that LHS  $\rightarrow 1$  and RHS  $\rightarrow +\infty$  as  $\varepsilon' \rightarrow 0^+$ . Therefore there must exist  $\delta_1 \in (0, 1)$  such that: for any  $0 < \varepsilon' < \delta_1$ ,  $f'(t) < 0$  for all  $t \in (0, 1)$ . Thus  $f(t) < 0$  for all  $t \in (0, 1)$ .

Now we show (b). By Lemma 8, we know that for all  $\varepsilon'$  sufficiently close to  $1^-$ ,  $f'$  has exactly two zeros  $t_1$  and  $t_2$ . By Lemma 7, we know that  $f'(t) > 0$  for  $t \in (t_1, t_2)$ . These imply that  $f(t)$  is decreasing on  $t \in (0, t_1)$ , increasing on  $t \in (t_1, t_2)$  and decreasing on  $t \in (t_2, 1)$ , which gives  $\arg \max_{t \in [0, 1]} f(t) \subseteq \{0, t_2\}$ . Furthermore, since  $f(0) = 0$  and  $f'(t) < 0$  for  $t \in (0, t_1)$ , we know  $f(t) < 0$  in  $t \in (0, t_1)$ . Also note that  $f(1) = -1 < 0$ . Therefore, depending on  $\varepsilon'$ , the sign of  $f(t)$  in  $t \in (0, 1)$  only has two possibilities: either  $f(t) < 0$  for all  $t \in (0, 1)$  except possibly one point where  $f(t) = 0$ , or there exist  $\tau_1$  and  $\tau_2$  as described in (b). In the latter case we have  $0 < t_1 < \tau_1 < t_2 < \tau_2 < 1$ .

We now show the existence of such  $\tau_1$  and  $\tau_2$  for all  $\varepsilon'$  sufficiently close to  $1^-$ . Since we have shown that  $\arg \max_{t \in [0, 1]} f(t) \subseteq \{0, t_2\}$  and  $f(0) = 0$ , it suffices to show  $f(t_2) > 0$ . Since  $f'(t_2) = 0$ , we have  $f(t_2) > 0 \Leftrightarrow f(t_2) - t_2 \cdot f'(t_2) > 0 \Leftrightarrow [(1 + \varepsilon')^3 - (1 + \varepsilon')]t_2^{(1+\varepsilon')^2} > [(1 - \varepsilon') - (1 - \varepsilon')^3]t_2^{(1-\varepsilon')^2}$ , which can be simplified into

$$\frac{(1 + \varepsilon')^3 - (1 + \varepsilon')}{(1 - \varepsilon') - (1 - \varepsilon')^3} > \frac{1}{t_2^{4\varepsilon'}}.$$

Since  $\varepsilon' < 1$ , it then suffices to show

$$1 + \frac{6}{\frac{2}{\varepsilon'} + \varepsilon' - 3} \geq \frac{1}{t_2^4}.$$

Observe that LHS  $\rightarrow +\infty$  as  $\varepsilon' \rightarrow 1^-$ . It remains to show that  $t_2$  is bounded away from 0 as  $\varepsilon' \rightarrow 1^-$ , i.e.,  $\liminf_{\varepsilon' \rightarrow 1^-} t_2(\varepsilon') > 0$ . We claim that  $\liminf_{\varepsilon' \rightarrow 1^-} t_2 \geq \frac{1}{2}$ . To show this, we note that

$$\liminf_{\varepsilon' \rightarrow 1^-} f'(q, \varepsilon') = \liminf_{\varepsilon' \rightarrow 1^-} 1 - (1 + \varepsilon')^3 \cdot q^{(1+\varepsilon')^2-1} - (1 - \varepsilon')^3 \cdot q^{(1-\varepsilon')^2-1} = 1 - 2^3 \cdot q^3,$$

which equals zero when  $q = \frac{1}{2}$ .

The claim in (b) that  $\tau_2(\varepsilon') \geq \frac{1}{3}$  follows directly from the above analysis since  $t_2 < \tau_2$  and  $\liminf_{\varepsilon' \rightarrow 1^-} t_2 \geq \frac{1}{2}$ .

To show  $\lim_{\varepsilon' \rightarrow 1^-} \tau_1(\varepsilon') = 0$ , we claim that  $\tau_1 \leq (1 - \varepsilon')^{0.9}$  as  $\varepsilon' \rightarrow 1^-$ . Then it suffices to show that  $f((1 - \varepsilon')^{0.9}, \varepsilon') > 0$  for all  $\varepsilon' \rightarrow 1^-$ . We have

$$\frac{1}{(1 - \varepsilon')^{0.9}} \cdot f((1 - \varepsilon')^{0.9}, \varepsilon') = 1 - (1 + \varepsilon')(1 - \varepsilon')^{0.9[(1+\varepsilon')^2-1]} - (1 - \varepsilon')^{1+0.9[(1-\varepsilon')^2-1]},$$

which tends to 1 as  $\varepsilon' \rightarrow 1^-$ . This implies (b).

We now show (c). First note that  $f(0) = 0$  and  $f(1) = -1$ .

When  $\varepsilon' = 1$ ,  $f(t) = t - 2t^4$ . In this case, we have  $f(t) > 0$  for  $t \in (0, 2^{-1/3})$  and  $f(t) < 0$  for  $t \in (2^{-1/3}, 1)$ .

When  $1 < \varepsilon' \leq 2$ , by Lemma 7, we have  $f'(t) = 1 + (\varepsilon' - 1)^3 t^{(\varepsilon'-1)^2-1} - (\varepsilon' + 1)^3 t^{(\varepsilon'+1)^2-1}$  being strictly decreasing on  $t \in (0, 1)$ . Therefore the function  $f(t)$  is concave. Since  $\lim_{t \rightarrow 0^+} f'(t) > 0$ ,  $f(0) = 0$  and  $f(1) = -1 < 0$ , the result follows by concavity.

When  $2 < \varepsilon'$ , again since  $f(0) = 0$  and  $f(1) = -1$ , it suffices to show  $f$  is strictly increasing and then strictly decreasing on  $t \in (0, 1)$ . Note that since  $\lim_{t \rightarrow 0^+} f'(t) = 1 > 0$  and  $\lim_{t \rightarrow 1^-} f'(t) < 0$ , it then suffices to show  $f'(t)$  is increasing and then decreasing on  $(0, 1)$ . To show this, it suffices to show that if  $f''(\hat{t}) = \frac{\partial}{\partial t} f'(\hat{t}) < 0$  for some  $\hat{t} \in (0, 1)$ , then  $f''(t) < 0$  for all  $t \in [\hat{t}, 1)$ . Now, since

$$f''(\hat{t}) < 0 \Leftrightarrow \frac{(\varepsilon' - 1)^3 [(\varepsilon' - 1)^2 - 1]}{(\varepsilon' + 1)^3 [(\varepsilon' + 1)^2 - 1]} < \hat{t}^{(\varepsilon'+1)^2 - (\varepsilon'-1)^2},$$

and  $\hat{t}^{(\varepsilon'+1)^2 - (\varepsilon'-1)^2} < t^{(\varepsilon'+1)^2 - (\varepsilon'-1)^2}$  for all  $t \geq \hat{t}$ , we conclude that  $f''(t) < 0$  for all  $t \in [\hat{t}, 1)$ . So we are done.  $\square$

Now we are in a position to prove Theorem 1.

*Proof of Theorem 1.* Let  $t_j = e^{-v_j^2}$  for all  $j \in [d]$ . By Lemma 3 and Lemma 4, we have

$$\begin{aligned} \frac{dL_n}{dn} &= W \sum_{j \in [d]} \mu(j) \frac{\partial L(v_j, \varepsilon'_j)}{\partial v_j} \cdot \frac{dv_j}{dn} = \frac{2W}{\sqrt{\pi}} \sum_{j \in [d]} \mu(j) f(t_j, \varepsilon'_j) \cdot \frac{\mu(j)}{2\sqrt{2}\sigma(j)\sqrt{n}}, \\ &= \frac{W}{\sqrt{2n\pi}} \sum_{j \in [d]} \frac{\mu^2(j)}{\sigma(j)} f(t_j, \varepsilon'_j). \end{aligned} \quad (6)$$

By part (a) of Lemma 5, when  $\varepsilon < \delta_1 \min_{j \in [d]} \mu(j)$ , we have for all  $j \in [d]$ , it holds that  $\varepsilon'_j < \delta_1$  and thus  $f(t_j, \varepsilon'_j) < 0$  for all  $t \in (0, 1)$ . Combining it with (6) yields  $\frac{dL_n}{dn} < 0$ .

When  $\max_{j \in [d]} \mu(j) \leq \varepsilon$ , we have for all  $j \in [d]$ , it holds that  $1 < \varepsilon'_j$ . It follows from part (c) of Lemma 5 that for all  $j \in [d]$ , there exists  $\tau_2(\varepsilon'_j)$  such that  $f(t_j, \varepsilon'_j) > 0 \forall t_j \in (0, \tau_2(\varepsilon'_j))$ . Pick  $\tau_2 = \min_j \tau_2(\varepsilon'_j)$ . Then for all  $j \in [d]$ , we have  $f(t_j, \varepsilon'_j) > 0$  when  $t_j < \tau_2$ . Since  $t_j = e^{-v_j^2} = \exp(-\frac{n\mu^2(j)}{2\sigma^2(j)})$ , when  $\exp(-\frac{n\mu^2(j)}{2\sigma^2(j)}) < \tau_2$ , or equivalently  $n > 2 \log\left(\frac{1}{\tau_2}\right) \max_{j \in [d]} \frac{\sigma^2(j)}{\mu^2(j)}$ , we have  $\frac{dL_n}{dn} > 0$ .

When  $\delta_2 \cdot \max_{j \in [d]} \mu(j) < \varepsilon < \min_{j \in [d]} \mu(j)$ , we have for all  $j \in [d]$ , it holds that  $\delta_2 < \varepsilon'_j < 1$ . Then by part (b) of Lemma 5, for all  $j \in [d]$ ,  $\exists \tau_1(\varepsilon'_j)$  and  $\tau_2(\varepsilon'_j)$  such that

$$f(t_j, \varepsilon'_j) \begin{cases} < 0 & \forall t \in (0, \tau_1(\varepsilon'_j)), \\ > 0 & \forall t \in (\tau_1(\varepsilon'_j), \tau_2(\varepsilon'_j)), \\ < 0 & \forall t \in (\tau_2(\varepsilon'_j), 1), \end{cases} \quad (7)$$

where  $\tau_1(\varepsilon'_j) \rightarrow 0^+$  as  $\varepsilon'_j \rightarrow 1^-$  and  $\tau_2(\varepsilon'_j) > \frac{1}{3}$ , for all  $j \in [d]$ . Let  $\tau_2 = \max_{j \in [d]} \tau_2(\varepsilon'_j) > \frac{1}{3}$ ,  $\tau_1 = \min_{j \in [d]} \tau_1(\varepsilon'_j)$  and  $\hat{\tau}_1 = \max_{j \in [d]} \tau_1(\varepsilon'_j)$ . Note that since  $\lim_{\varepsilon'_j \rightarrow 1^-} \tau_1(\varepsilon'_j) = 0$ , without loss of generality we can assume  $\hat{\tau}_1 < \frac{1}{3}$ . It follows from (7) that for all  $j \in [d]$

$$f(t_j, \varepsilon'_j) \begin{cases} < 0 & \forall t \in (0, \tau_1), \\ > 0 & \forall t \in (\hat{\tau}_1, \frac{1}{3}), \\ < 0 & \forall t \in (\tau_2, 1). \end{cases} \quad (8)$$

Denote  $\gamma = \frac{\mu(j)}{\sigma(j)}$  for all  $j \in [d]$  since this ratio is fixed. Then we have  $t_j = \exp\left(-\frac{\mu^2(j)n}{2\sigma^2(j)}\right) = \exp(-\gamma^2 n/2)$ . Therefore we can choose  $N_4 = \log(\tau_1^{-1}) \cdot \left(\frac{2}{\gamma^2}\right)$ ,  $N_3 = \log(\hat{\tau}_1^{-1}) \cdot \left(\frac{2}{\gamma^2}\right)$ ,  $N_2 = \log(3) \cdot \left(\frac{2}{\gamma^2}\right)$  and  $N_1 = \log(\tau_2^{-1}) \cdot \left(\frac{2}{\gamma^2}\right)$  where  $N_1 < N_2 < N_3 < N_4$  and the result follows from (6) and (8).  $\square$

*Proof of Corollary 2.* From the proof of Theorem 1, in this simplified case we have  $\tau_1 = \hat{\tau}_1$  and  $\tau_2 = \tau_2(\varepsilon'_j)$  for all  $j$ . It follows that the thresholds  $N_1$ ,  $N_2$ ,  $N_3$ , and  $N_4$  in Theorem 1 satisfy  $N_1 = N_2$ , and  $N_3$  is no longer needed and can be replaced by  $N_4$ . Therefore only two thresholds are needed in Corollary 2. We denote the two thresholds as  $N_1$  and  $N_2$ .

It remains to show  $\lim_{\varepsilon \rightarrow \mu_0^-} N_2(\varepsilon) - N_1(\varepsilon) = +\infty$ . From part (b) of Lemma 5 and (6), we know the derivative  $\frac{dL_n}{dn}$  is positive when  $t := \exp(-\frac{n\mu_0^2}{2\sigma_0^2}) \in (\tau_1, \tau_2)$ , or equivalently  $n \in \left(\log\left(\frac{1}{\tau_2}\right) \frac{2\sigma_0^2}{\mu_0^2}, \log\left(\frac{1}{\tau_1}\right) \frac{2\sigma_0^2}{\mu_0^2}\right)$ . By (b) of Lemma 5, we know  $\tau_1 \rightarrow 0^+$  as  $\varepsilon \rightarrow \mu_0^-$  while  $\tau_2$  is bounded away from 0. This shows  $\lim_{\varepsilon \rightarrow \mu_0^-} \log\left(\frac{1}{\tau_1}\right) - \log\left(\frac{1}{\tau_2}\right) = +\infty$  and completes the proof.  $\square$

## 2 PROOF OF LEMMA

In this section we give the proof of Lemma 3.

Let  $f^* \in S_2$ , i.e.,  $f^*$  is a minimizer of  $\sum_{i=1}^n \max_{\|\tilde{x}_i - x_i\|_\infty < \varepsilon} H(-y_i(\tilde{t}_i - f(\tilde{s}_i)))$  with the smallest  $\ell_1$  norm. To show  $S_2$  is nonempty and such  $f^*$  does exist, we specify the form of  $f^*$ . We claim that  $f^*$  can take the following form

$$f^*(s) = \sum_{j=1}^N \alpha_j \mathbb{1}[s \in I_j], \quad (9)$$

where  $I_j = (j - \varepsilon, j + \varepsilon)$ ,  $j \in [N]$ . Indeed, by definition of  $H$ , we know that the value of  $f^*$  outside those intervals  $I_j$ 's won't change the value of  $H(-y_i(\tilde{t}_i - f(\tilde{s}_i)))$ . Therefore in order to attain the smallest possible  $\ell_1$  norm, we must have  $f^*(s) = 0$  for all  $s \notin \cup_j I_j$ .

Note that by letting  $\varepsilon < 1/2$ , any two intervals have no overlap. To see why  $f^*$  is a constant function over each interval  $I_j$ , we consider three possible cases of the dataset  $\{(x_i, y_i), i \in [n]\}$ . For the first case, suppose that those data points with  $s = j$  contain only positive points. Then in order to correctly classify these points with  $\varepsilon$  perturbation, we must have  $f^*(s) \leq \mu - \varepsilon$  for all  $s \in I_j$ . In order to minimize  $\|f^*\|_1$ , we would take  $\alpha_j = \min\{0, \mu - \varepsilon\}$ . Similarly, if those points purely consist of negative points, then  $\alpha_j = \max\{0, -\mu + \varepsilon\}$ . For the second case, suppose that those data points with  $s = j$  contain both positive and negative points. Suppose the number of positive points exceeds the number of negative points. Then to correctly classify the positive points, we have  $f^*(s) \leq \mu - \varepsilon$  for all  $s \in I_j$ . To correctly classify the negative points, we have  $f^*(s) \geq -\mu + \varepsilon$  for all  $s \in I_j$ . If  $-\mu + \varepsilon \leq 0 \leq \mu - \varepsilon$ , then  $\alpha_j = 0$ . Otherwise, if  $-\mu + \varepsilon > \mu - \varepsilon$ , then  $f^*$  can never simultaneously classify both classes correctly. It will choose to correctly classify the class with more points, which is the positive class. Then  $\alpha_j = \mu - \varepsilon$ . On the other hand, if negative class has more points, then  $\alpha_j = -\mu + \varepsilon$ . If the two class have equal number of points at  $s = j$ , then  $\alpha_j$  can be either  $-\mu + \varepsilon$  or  $\mu - \varepsilon$ . For the third case, assume no point in the training set has  $s = j$ . Then  $\alpha_j = 0$ .

We have now specified the form that  $f^* \in S_2$  can take, which also indicates that  $S_2$  is nonempty. We now show for all sufficiently small  $\lambda$ ,  $S(\lambda) = S_2$ .

First we show  $S(\lambda) \subseteq S_2$ . Let  $f \in S(\lambda)$ . We want to show  $f \in S$  and  $\|f\|_1 \leq \|\hat{f}\|_1$  for all  $\hat{f} \in S$ . Suppose on the contrary that  $f \notin S$ . Then by definition of  $H$ , there exists  $f^* \in S$  s.t.

$$\sum_{i=1}^n \max_{\|\tilde{x}_i - x_i\|_\infty < \varepsilon} H(-y_i(\tilde{t}_i - f^*(\tilde{s}_i))) \leq \sum_{i=1}^n \max_{\|\tilde{x}_i - x_i\|_\infty < \varepsilon} H(-y_i(\tilde{t}_i - f(\tilde{s}_i))) - 1/2$$

and since  $S_2$  is nonempty we can further assume  $f^*$  satisfies

$$\|f^*\|_1 \in \arg \min_{\hat{f} \in S} \|\hat{f}\|_1.$$

Since  $f \in S(\lambda)$ , we then have  $\lambda\|f\|_1 \leq \lambda\|f^*\|_1 - 1/2$ , which implies  $\|f^*\|_1 \geq 1/2\lambda$ . From above analysis we know  $f^*$  must take the form of Eq. (9) where  $\alpha_j \leq |\mu - \varepsilon|$ , and  $I_j$  has length equal to  $2\varepsilon$ . This implies  $\|f^*\|_1 \leq 2N\varepsilon|\mu - \varepsilon|$ . Therefore, if we pick  $\lambda < \frac{1}{4N\varepsilon|\mu - \varepsilon|}$ , then such  $f^*$  cannot exist. Therefore, for all sufficiently small  $\lambda$ , we have  $f \in S$ .

Now we show  $\|f\|_1 \leq \|\hat{f}\|_1$  for all  $\hat{f} \in S$ . Suppose on the contrary that there exists  $f^* \in S$  such that  $\|f^*\|_1 < \|f\|_1$ . However, since we have already shown

$$\sum_{i=1}^n \max_{\|\tilde{x}_i - x_i\|_\infty < \varepsilon} H(-y_i(\tilde{t}_i - f^*(\tilde{s}_i))) = \sum_{i=1}^n \max_{\|\tilde{x}_i - x_i\|_\infty < \varepsilon} H(-y_i(\tilde{t}_i - f(\tilde{s}_i))),$$

this would contradict the fact that  $f \in S(\lambda)$ . Therefore we have  $S(\lambda) \subseteq S_2$ .

To see  $S_2 \subseteq S(\lambda)$  for all sufficiently small  $\lambda$ , we again pick  $\lambda < \frac{1}{4N\varepsilon|\mu - \varepsilon|}$ . Note that since  $\|f^*\|_1 \leq 2N\varepsilon|\mu - \varepsilon|$  for all  $f^* \in S_2$ , we have  $\lambda\|f^*\|_1 < \frac{1}{2}$ . Now suppose on the contrary that there exists  $f \notin S_2$  such that

$$\sum_{i=1}^n \max_{\|\tilde{x}_i - x_i\|_\infty < \varepsilon} H(-y_i(\tilde{t}_i - f(\tilde{s}_i))) + \lambda\|f\|_1 < \sum_{i=1}^n \max_{\|\tilde{x}_i - x_i\|_\infty < \varepsilon} H(-y_i(\tilde{t}_i - f^*(\tilde{s}_i))) + \lambda\|f^*\|_1.$$

Since  $f^* \in S_2$ , we must have  $\lambda\|f\|_1 < \lambda\|f^*\|_1 < \frac{1}{2}$ . Now, if  $\sum_{i=1}^n \max_{\|\tilde{x}_i - x_i\|_\infty < \varepsilon} H(-y_i(\tilde{t}_i - f(\tilde{s}_i))) \leq \sum_{i=1}^n \max_{\|\tilde{x}_i - x_i\|_\infty < \varepsilon} H(-y_i(\tilde{t}_i - f^*(\tilde{s}_i)))$ , this would contradict the fact that  $f^*$  is in  $\arg \min_S \|f\|_1$ . Therefore we

must have  $\sum_{i=1}^n \max_{\|\tilde{x}_i - x_i\|_\infty < \varepsilon} H(-y_i(\tilde{t}_i - f(\tilde{s}_i))) > \sum_{i=1}^n \max_{\|\tilde{x}_i - x_i\|_\infty < \varepsilon} H(-y_i(\tilde{t}_i - f^*(\tilde{s}_i)))$ . However, by definition of  $H$ , this implies

$$\begin{aligned} \sum_{i=1}^n \max_{\|\tilde{x}_i - x_i\|_\infty < \varepsilon} H(-y_i(\tilde{t}_i - f(\tilde{s}_i))) + \lambda \|f\|_1 &\geq \sum_{i=1}^n \max_{\|\tilde{x}_i - x_i\|_\infty < \varepsilon} H(-y_i(\tilde{t}_i - f^*(\tilde{s}_i))) + \frac{1}{2} + \lambda \|f\|_1 \\ &\geq \sum_{i=1}^n \max_{\|\tilde{x}_i - x_i\|_\infty < \varepsilon} H(-y_i(\tilde{t}_i - f^*(\tilde{s}_i))) + \lambda \|f^*\|_1, \end{aligned}$$

which is a contradiction. Therefore  $S_2 \subseteq S(\lambda)$ . Altogether we have  $S(\lambda) = S_2$ .

### 3 PROOF OF THEOREM

In this section, we give the proof of Theorem 4.

The proof follows from the Lemma 3 and its proof. By Lemma 3, we have  $S(\lambda) = S_2$  and we can consider the equivalent definition that  $f_n^{\text{rob}} \in S_2$ . From the proof of Lemma 3, we know  $f_n^{\text{rob}}$  must take the form of (9). Since  $|\alpha_j| \leq |\mu - \varepsilon|$ , when  $\varepsilon < 2\mu$ , we have  $|\alpha_j| < \mu$  and thus  $|f_n^{\text{rob}}(s)| < \mu$  for all  $s \in \mathbb{R}$ . For such  $f_n^{\text{rob}}$ , we have  $H(-y(t - f_n^{\text{rob}}(s))) = 0$  for all  $(x, y) = (s, t, y)$  in the support of  $\mathcal{D}_{2N}$ . This implies  $L_n = 0$  for all  $n$ .

Assume  $2\mu < \varepsilon < 1/2$ . Then  $|\alpha_j|$  can take the value of either 0 or  $|\mu - \varepsilon| > |\mu|$ . When  $\alpha_j = 0$ ,  $f_n^{\text{rob}}$  can classify both the positive and negative points at location  $s = j$  correctly. When  $|\alpha_j| > \mu$ , then  $f_n^{\text{rob}}$  can only classify one of the two classes correctly. Note that  $\alpha_j = 0$  if and only if there is no point with  $s = j$  in the training set. Let the random variable  $Z \in 0 \cup [N]$  denote the cardinality of the set  $\{j \in [N] : s_i \neq j \text{ for all } i \in [n]\}$ , which is a function of the training set  $\{(x_i, y_i)\}_{i=1}^n$ . Then the generalization error can be written as

$$L_n = \mathbb{E}_{\{(x_i, y_i)\}_{i=1}^n \stackrel{\text{i.i.d.}}{\sim} \mathcal{D}_{2N}} \frac{N - Z}{N} = 1 - \frac{\mathbb{E}_{\{(x_i, y_i)\}_{i=1}^n} Z}{N}.$$

Note that  $\mathbb{E}_{\{(x_i, y_i)\}_{i=1}^n} Z$  decreases as  $n$  increases. Therefore  $L_n < L_{n+1}$  for all  $n$ .

## 4 FURTHER DETAILS ON GAUSSIAN MIXTURE WITH 0-1 LOSS

### 4.1 PROOF OF PROPOSITION

Here we give the proof of Proposition 5.

*Proof of Proposition 5:* By (1), it suffices to show that under the 0-1 loss

$$\sum_{i=1}^n \max_{\tilde{x}_i \in B_{x_i}^\infty(\varepsilon)} \mathbb{1}[y_i(\tilde{x}_i - w) < 0] = \sum_{i=1}^n y_i \mathbb{1}[x'_i < w]. \quad (10)$$

Conditioning on whether there exists  $\tilde{x}_i \in B_{x_i}^\infty(\varepsilon)$  such that  $\mathbb{1}[y_i(\tilde{x}_i - w) < 0] = 1$  or not, one can deduce that

$$\arg \max_{\tilde{x}_i \in B_{x_i}^\infty(\varepsilon)} \mathbb{1}[y_i(\tilde{x}_i - w) < 0] \supseteq \arg \min_{\tilde{x}_i \in B_{x_i}^\infty(\varepsilon)} y_i(\tilde{x}_i - w) = \{x'_i\},$$

and it follows that

$$\sum_{i=1}^n \max_{\tilde{x}_i \in B_{x_i}^\infty(\varepsilon)} \mathbb{1}[y_i(\tilde{x}_i - w) < 0] = \sum_{i=1}^n \mathbb{1}[y_i(x'_i - w) < 0] = \sum_{i=1}^n y_i \mathbb{1}[x'_i < w].$$

□



## 4.2 TEST LOSS AND OPTIMAL TIEBREAK

To find the optimal tiebreaking in hindsight, we need to minimize the test loss over the model parameter  $w$ , which is given by Proposition 9.

**Proposition 9.** *The test loss of classifier  $w$  is given by*

$$\mathbb{E}_{(x,y) \sim \mathcal{D}_{\mathcal{N}}}[\mathbb{1}[y(x-w) < 0]] = \frac{1}{2} + \frac{1}{2} \left( \Phi \left( \frac{w-\mu}{\sigma} \right) - \Phi \left( \frac{w+\mu}{\sigma} \right) \right), \quad (11)$$

where  $\Phi$  is the CDF of the standard normal distribution. Furthermore, the minimizer of (11) is  $w = 0$ .

Proposition 9 indicates that the optimal tiebreak in hindsight chooses the point closest to 0 (i.e., the point with the minimum absolute value) from (the closure of) the interval where  $w^*$  lies. This is because  $w = 0$  minimizes the test loss in (11), and one can see that (11) increases as  $|w|$  increases. Indeed, the derivative of (11) is given by  $\frac{1}{2\sigma\sqrt{2\pi}} \left( \exp\left(-\frac{(w-\mu)^2}{2\sigma^2}\right) - \exp\left(-\frac{(w+\mu)^2}{2\sigma^2}\right) \right)$ , which is negative for  $w < 0$  and positive for  $w > 0$ .

*Proof of Proposition 9:* Conditioning on  $y = \pm 1$ , we have

$$\begin{aligned} & \mathbb{E}_{(x,y) \sim \mathcal{D}_{\mathcal{N}}}[\mathbb{1}[y(x-w) < 0]] \\ &= \mathbb{P}(y = 1) \cdot \mathbb{E}_{x|y=1}[\mathbb{1}[y(x-w) < 0]] + \mathbb{P}(y = -1) \cdot \mathbb{E}_{x|y=-1}[\mathbb{1}[y(x-w) < 0]] \\ &= \frac{1}{2} \cdot \mathbb{E}_{x \sim \mathcal{N}(\mu, \sigma)}[\mathbb{1}[x-w < 0]] + \frac{1}{2} \cdot \mathbb{E}_{x \sim \mathcal{N}(-\mu, \sigma)}[\mathbb{1}[x-w > 0]] \\ &= \frac{1}{2} \cdot \mathbb{P}_{z \in \mathcal{N}(0,1)} \left( z < \frac{w-\mu}{\sigma} \right) + \frac{1}{2} \cdot \mathbb{P}_{z \in \mathcal{N}(0,1)} \left( z > \frac{w+\mu}{\sigma} \right) \\ &= \frac{1}{2} \cdot \Phi \left( \frac{w-\mu}{\sigma} \right) + \frac{1}{2} \cdot \left[ 1 - \Phi \left( \frac{w+\mu}{\sigma} \right) \right]. \end{aligned}$$

Since the derivative is  $\frac{1}{2\sigma\sqrt{2\pi}} \left( \exp\left(-\frac{(w-\mu)^2}{2\sigma^2}\right) - \exp\left(-\frac{(w+\mu)^2}{2\sigma^2}\right) \right)$ , we see that  $w^* = 0$  minimizes the above quantity.  $\square$
